# Supplementary material for: Dynamics Govern Specificity of a Protein-Protein Interface: Substrate Recognition by Thrombin
Source: PubMed Central journal article supplement (PMC4619833; doi:10.1371/journal.pone.0140713), 2015-10-23
Supplement: pone.0140713.s001.pdf [file pone.0140713.s001.pdf]

**Supporting Information:**

**Dynamics Govern Specificity of a Protein-Protein  
Interface: Substrate Recognition by Thrombin**

**Julian E. Fuchs, Roland G. Huber, Birgit J. Waldner, Ursula Kahler, Susanne  
von Grafenstein, Christian Kramer, Klaus R. Liedl**

## Supplementary Materials:

Figures A-F

Table A-C

### Figure A:

Rank-based flexibility landscapes of the thrombin binding site.

Cleavage entropy mapped to thrombin sub-pockets (A) with colors ranging from red (specific) to green (unspecific) in comparison with sub-pocket average global backbone B-factors (B),  $\phi$  entropy (C) and  $\psi$  entropy (D) with colors ranging from red (rigid or low dihedral entropy, respectively) to green (flexible or high dihedral entropy, respectively). Coloring is based on ranking of respective pockets.

### Figure B:

Rank-based mapping of water thermodynamics to the thrombin binding site.

Cleavage entropy mapped to thrombin sub-pockets (A) with colors ranging from red (specific) to green (unspecific) in comparison with sub-pocket average translational entropy of water (B), orientational entropy of water (C) and solute-water enthalpic interactions (D) with colors ranging from red (high ordering and strong interactions) to green (low ordering and weak interactions). Coloring is based on ranking of respective pockets.

### Figure C:

2D-RMSD plots of thrombin holo and fibrinogen bound ( $C\alpha$  positions of the binding site).

2D-RMSD plots of thrombin 1000ns molecular dynamics trajectory (A-C).

Comparison of holo simulation (A) and complex simulation (B) shows higher RMSD values in the holo simulation indicating rigidification on substrate binding.

Combination of (A) and (B) into (C) shows sampling of overlapping conformational space.

### Figure D:

Trajectory splitting for global Backbone B Factors.

Sub-pockets S1 and S2 consistently show lower B Factors than sub-pockets S3-S6. Higher B Factors in trajectory parts 6-9 indicate conformational changes within the binding site.

**Figure E:**

Trajectory splitting for  $S\phi$ .

Sub-pockets S1 and S2 show the lowest  $\phi$  entropies. Sub-pockets S3-S6 show varying higher  $\phi$  entropies. Higher  $\phi$  entropies in trajectory parts 6-9 indicate conformational changes within the binding site.

**Figure F:**

Trajectory splitting for  $S\psi$ .

Again, sub-pockets S1 and S2 show the lowest  $\psi$  entropies. Sub-pockets S3-S6 show varying higher  $\psi$  entropies. Higher  $\psi$  entropies in trajectory parts 6-9 indicate conformational changes within the binding site.

**Fig. A:**

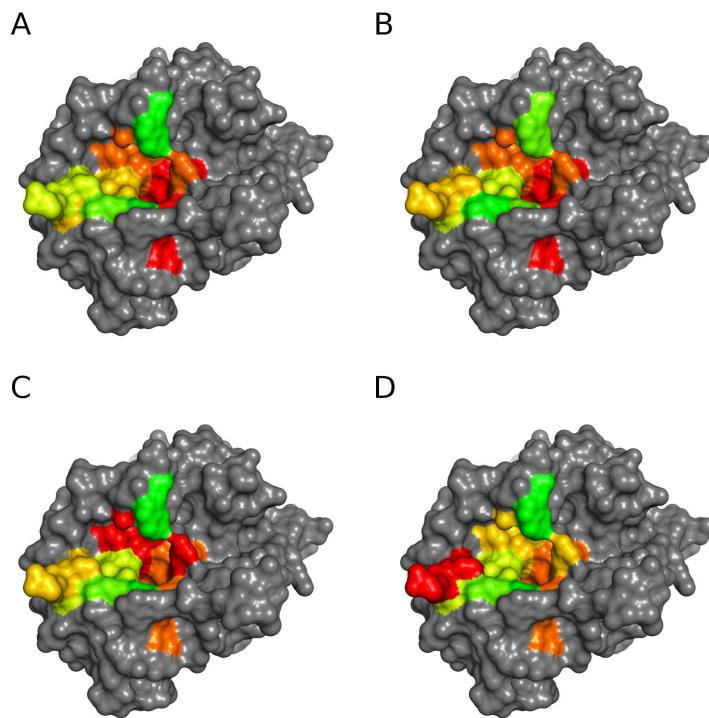

**Fig. B:**

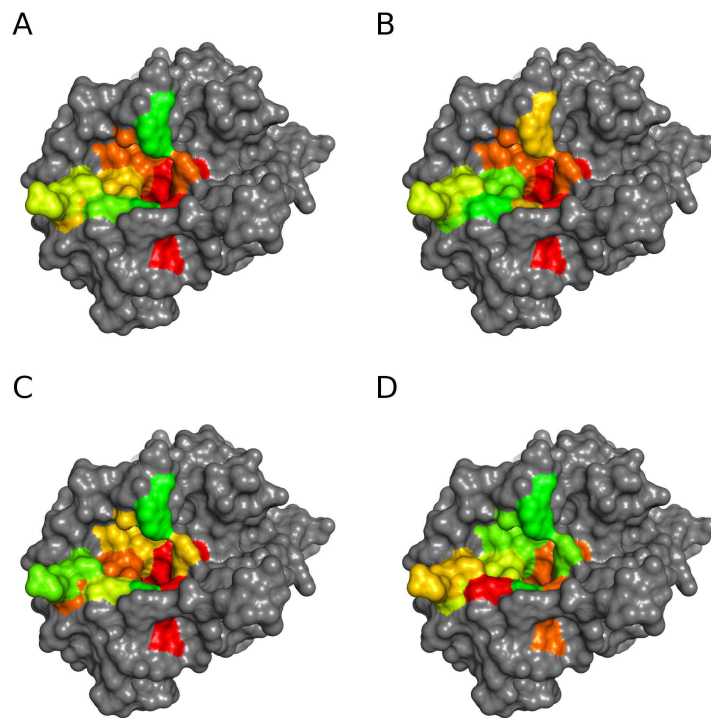

**Fig. C:**

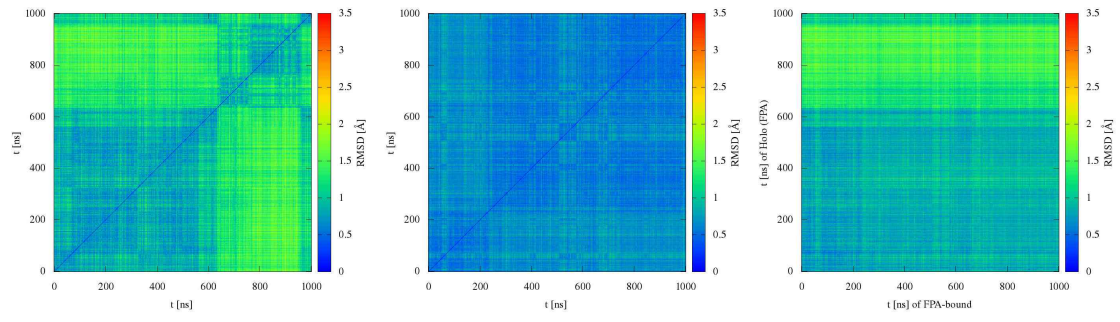

**Fig. D:**

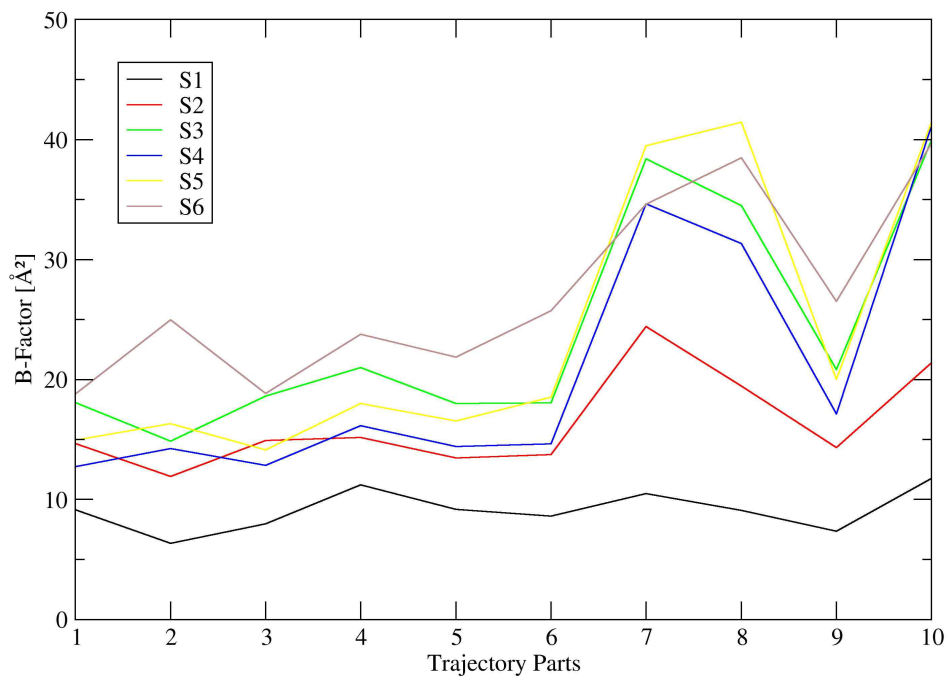

**Fig. E:**

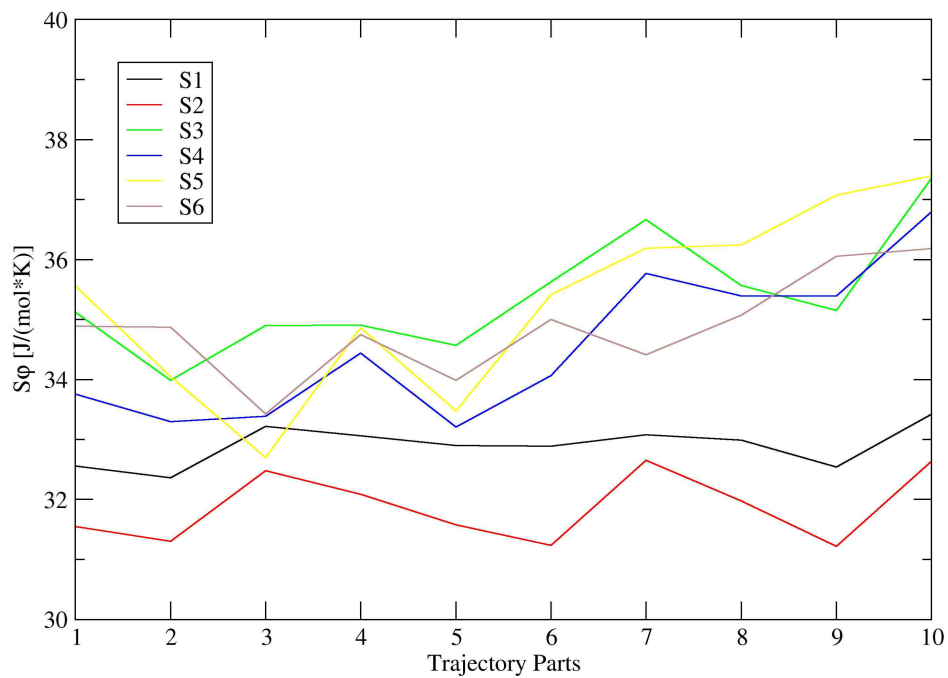



**Fig. F:**

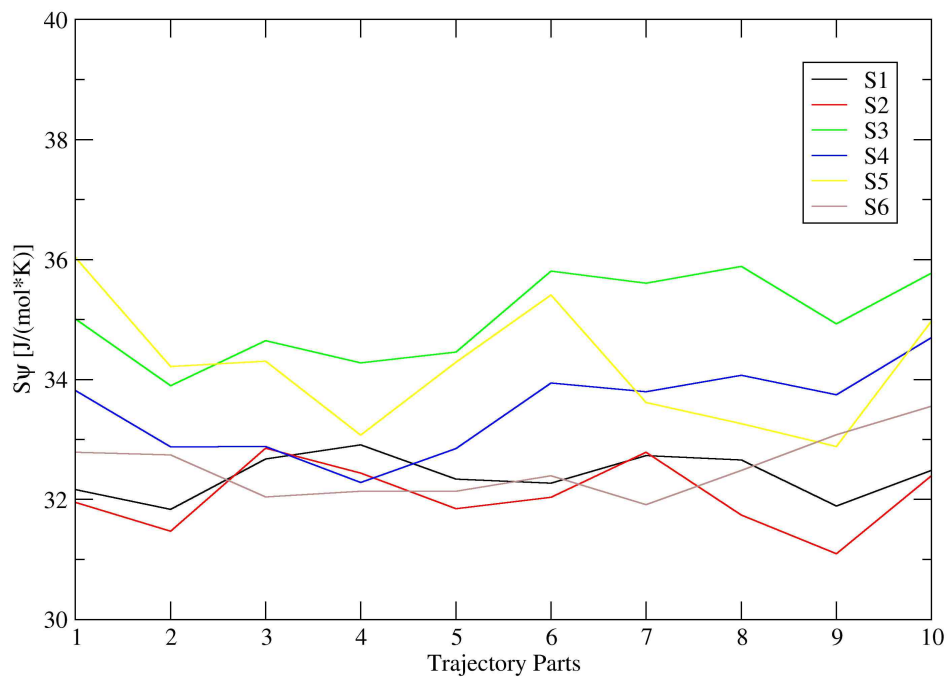

**Table A: Analysis of the thrombin-F13 system.**

Sub-pocket-wise analysis of entropic and enthalpic metrics for the thrombin-F13 system. Here, 1  $\mu$ s trajectories of both complex and holo structure were prepared and analyzed in analogy to the system setup described for the thrombin-Fib system. We observe similar trends as for the main system. Entropic metrics (B-factors, dihedral entropies, hydration entropies) correlate to cleavage entropy, whereas enthalpic metrics (solute-water interactions, hydrogen bonding) show less correlation to substrate specificity. All binding site properties except the hydrogen bonding occupancies were derived from the apo simulation.

|                                               | S6    | S5    | S4    | S3    | S2    | S1    | $r_{\text{Spearman}}$ |
|-----------------------------------------------|-------|-------|-------|-------|-------|-------|-----------------------|
| $S_{\text{Cleavage}}$                         | 0.899 | 0.959 | 0.892 | 0.971 | 0.635 | 0.176 |                       |
| Global C $\alpha$ B-Factor [ $\text{\AA}^2$ ] | 97.2  | 85.6  | 71.4  | 66.8  | 32.1  | 14.4  | 0.60                  |
| $S_{\phi}$<br>[J/(mol*K)]                     | 36.3  | 38.4  | 37.3  | 37.6  | 33.7  | 33.5  | 0.89                  |
| $S_{\psi}$<br>[J/(mol*K)]                     | 35.2  | 37.1  | 36.1  | 36.8  | 33.7  | 32.9  | 0.89                  |
| $dTS_{\text{trans}}$<br>[kcal/mol]            | 0.12  | 0.15  | 0.11  | 0.07  | 0.10  | -0.38 | 0.43                  |
| $dTS_{\text{orient}}$<br>[kcal/mol]           | -0.44 | -0.38 | -0.44 | -0.18 | -0.93 | -1.10 | 1.00                  |
| $H_{\text{solv}}$<br>[kcal/mol]               | -8.24 | -9.13 | -8.30 | -5.77 | -7.36 | -8.70 | 0.20                  |
| H-Bond<br>Occupancy                           | 0.39  | 0.07  | 0.27  | 0.02  | 0.00  | 4.02  | 0.37                  |

**Table B: Analysis of the thrombin-PAR1 system.**

Sub-pocket-wise analysis of entropic and enthalpic metrics for the thrombin-PAR1 system. Here, 1  $\mu$ s trajectories of both complex and holo structure were prepared and analyzed in analogy to the system setup described for the thrombin-Fib system. We observe similar trends as for the main system. Entropic metrics (B-factors, dihedral entropies, hydration entropies) correlate to cleavage entropy, whereas enthalpic metrics (solute-water interactions, hydrogen bonding) show less correlation to substrate specificity. All binding site properties except the hydrogen bonding occupancies were derived from the apo simulation.

|                                               | S6     | S5     | S4     | S3    | S2    | S1    | $r_{\text{Spearman}}$ |
|-----------------------------------------------|--------|--------|--------|-------|-------|-------|-----------------------|
| $S_{\text{Cleavage}}$                         | 0.899  | 0.959  | 0.892  | 0.971 | 0.635 | 0.176 |                       |
| Global C $\alpha$ B-Factor [ $\text{\AA}^2$ ] | 47.6   | 30.7   | 27.9   | 32.6  | 20.4  | 13.2  | 0.83                  |
| $S_{\phi}$<br>[J/(mol*K)]                     | 36.0   | 36.5   | 37.5   | 37.7  | 33.6  | 34.0  | 0.77                  |
| $S_{\psi}$<br>[J/(mol*K)]                     | 34.1   | 37.8   | 36.1   | 36.6  | 32.7  | 32.8  | 0.77                  |
| $dTS_{\text{trans}}$<br>[kcal/mol]            | -0.12  | -0.19  | -0.74  | -0.06 | -0.19 | -0.39 | 0.60                  |
| $dTS_{\text{orient}}$<br>[kcal/mol]           | -1.01  | -1.14  | -1.63  | -0.22 | -0.78 | -0.94 | 0.09                  |
| $H_{\text{solv}}$<br>[kcal/mol]               | -11.69 | -11.81 | -11.37 | -3.76 | -6.29 | -7.93 | -0.09                 |
| H-Bond<br>Occupancy                           | 0.02   | 0.31   | < 0.01 | 0.84  | 0.30  | 3.65  | 0.03                  |

**Table C: Thrombin sub-pocket residues.**

Sub-pocket residues were chosen according to proximity to the corresponding ligand binding site. All residues with at least one atom in a proximity of less than 3.5Å were included in the pocket definition. Pocket definitions for Thr<sub>Com,Fib</sub> and Thr<sub>Com,F13</sub> were merged to obtain a more generic binding site definition.

| Pocket   | S6      | S5      | S4      | S3      | S2      | S1       |
|----------|---------|---------|---------|---------|---------|----------|
| Residues | Arg-173 | Ile-174 | Thr-172 | Trp-60D | His-57  | His-57   |
|          | Ile-174 | Glu-217 | Ile-174 | Trp-215 | Tyr-60A | Asp-189  |
|          |         |         | Trp-215 | Gly-216 | Trp-60D | Ala-190  |
|          |         |         | Gly-216 | Glu-217 | Leu-99  | Cys-191  |
|          |         |         | Glu-217 | Gly-219 | Glu-192 | Glu-192  |
|          |         |         |         |         | Ser-214 | Gly-193  |
|          |         |         |         |         | Trp-215 | Asp-194  |
|          |         |         |         |         |         | Ser-195  |
|          |         |         |         |         |         | Val-213  |
|          |         |         |         |         |         | Ser-214  |
|          |         |         |         |         |         | Trp-215  |
|          |         |         |         |         |         | Gly-216  |
|          |         |         |         |         |         | Gly-219  |
|          |         |         |         |         |         | Cys-220  |
|          |         |         |         |         |         | Asp-221A |
|          |         |         |         |         |         | Gly-226  |
|          |         |         |         |         | Phe-227 |          |
